# Supplementary material for: Tridecaboron diphosphide: a new infrared light active photocatalyst for efficient CO2 photoreduction under mild reaction conditions
Source: Royal Society of Chemistry journal article supplement (doi:10.1039/d0ta10804a), 2020-12-18
Supplement: d0ta10804a1.pdf [file d0ta10804a1.pdf]

# **Tridecaboron Diphosphide: A New Infrared Light Active Photocatalyst for Efficient CO<sub>2</sub> Photoreduction under Mild Reaction Conditions**

Li Shi <sup>a</sup>, Xiaohui Ren <sup>a,b</sup>, Qi Wang <sup>a,b</sup>, Wei Zhou <sup>d</sup>, Jinhua Ye <sup>a,b,c\*</sup>

<sup>a</sup> International Center for Materials Nanoarchitectonics (WPI-MANA), National Institute for Materials Science (NIMS), 1-1 Namiki, Tsukuba, Ibaraki, 305-0044, Japan.

<sup>b</sup> Graduate School of Chemical Sciences and Engineering, Hokkaido University, Sapporo, 060-0814, Japan.

<sup>c</sup> TJU-NIMS International Collaboration Laboratory, School of Material Science and Engineering, Tianjin University; Collaborative Innovation Center of Chemical Science and Engineering (Tianjin), Tianjin 300072, P. R. China.

<sup>d</sup> Department of Applied Physics, Tianjin Key Laboratory of Low Dimensional Materials Physics and Preparing Technology, Faculty of Science, Tianjin University, Tianjin 300072, P. R. China.

E-mail: Jinhua.YE@nims.go.jp

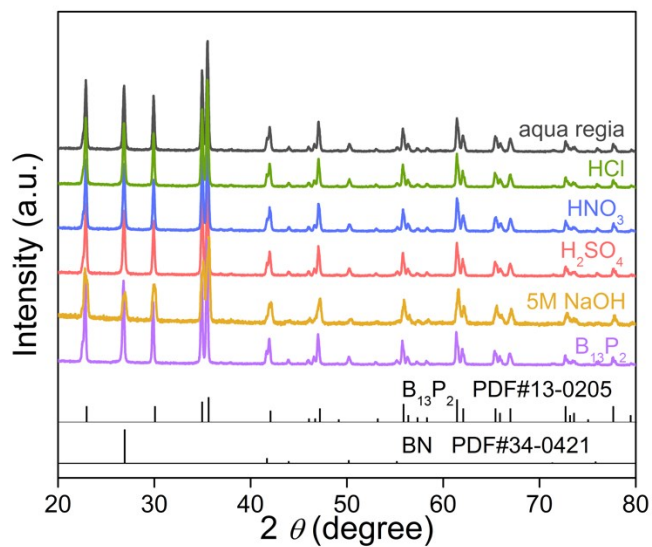

Figure S1. XRD patterns of commercial  $B_{13}P_2$  before and after concentrated acid and 5M NaOH solution treatment.

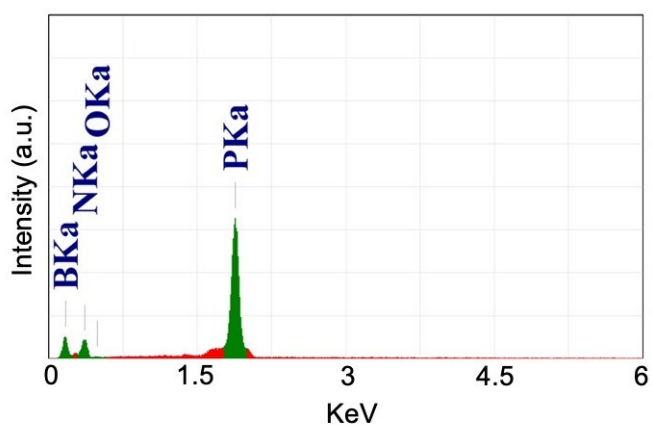

Figure S2. Energy Dispersive Spectrometer (EDS) of commercially available  $B_{13}P_2$ .

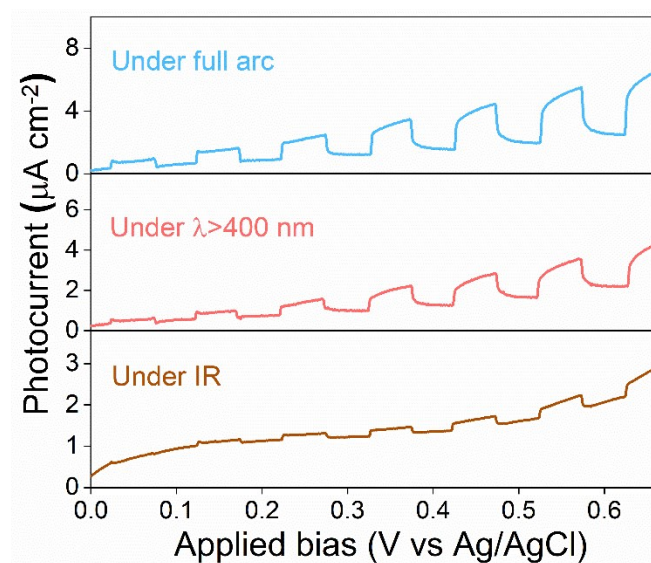

Figure S3. Linear-sweep-voltammetry sweeps for the  $B_{13}P_2$  photoanode under full arc,  $\lambda > 400\ nm$  and IR light.

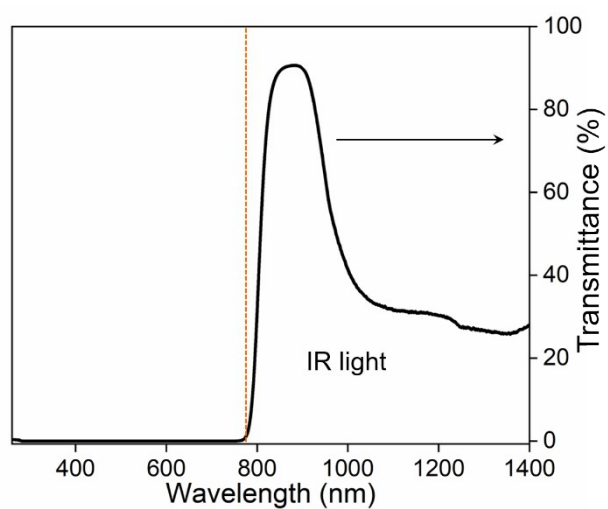

Figure S4. Transmittance spectrum of UV-Vis cutoff filter. It shows that the produced incident light wavelength is  $\lambda > 780\ nm$ .

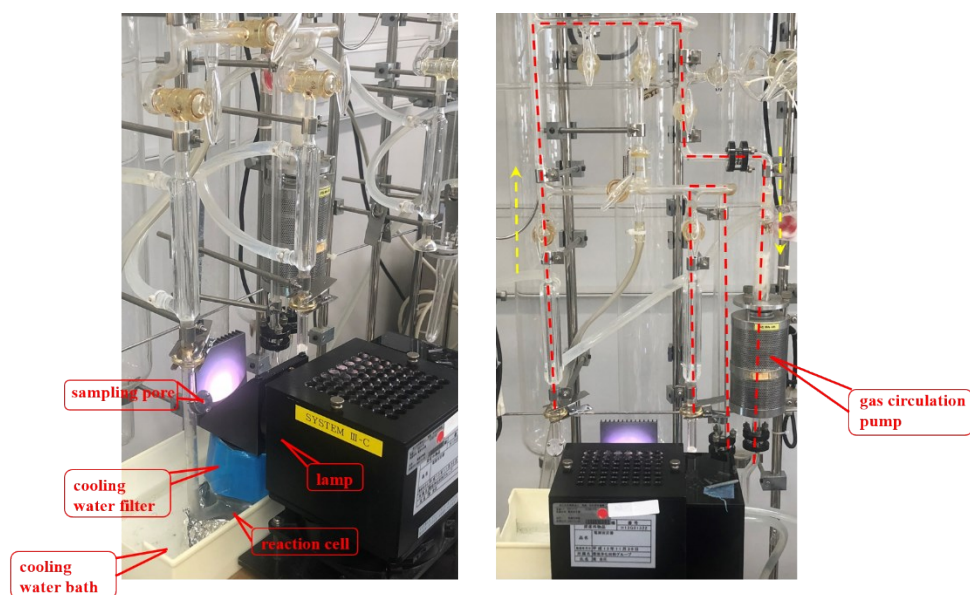

Figure S5. The experimental setup for photocatalytic CO<sub>2</sub> reduction.

Table S1. Comparison of photocatalytic CO<sub>2</sub> reduction performances over different photocatalysts.

| photocatalysts                 | Light source                                                       | CO <sub>2</sub> reduction activity | References                                 |
|--------------------------------|--------------------------------------------------------------------|------------------------------------|--------------------------------------------|
| B <sub>13</sub> P <sub>2</sub> | 300 W Xe lamp, IR light ( $\lambda > 780$ nm)                      | CO: 0.13 $\mu\text{mol h}^{-1}$    | This work                                  |
| CuS                            | 300 W Xe lamp with AM 1.5 G filter, IR light ( $\lambda > 800$ nm) | CO: 0.073 $\mu\text{mol h}^{-1}$   | J. Am. Chem. Soc. 2019, 141, 423–430.      |
| Defective WO <sub>3</sub>      | 40 W silicon nitride lamp, IR light ( $\lambda > 800$ nm)          | CO: 0.015 $\mu\text{mol h}^{-1}$   | Joule 2018, 2, 1004.                       |
| UiO-66/CNNS                    | 300 W Xe lamp, visible light (400 nm $< \lambda < 800$ nm)         | CO: 0.099 $\mu\text{mol h}^{-1}$   | Adv. Funct. Mater. 2015, 25, 5360–5367.    |
| BiOCl                          | 500 W Xe lamp, full arc                                            | CO: 0.101 $\mu\text{mol h}^{-1}$   | Nano Research 2015, 8, 821–831.            |
| BiOIO <sub>3</sub>             | 300 W Xe lamp, full arc                                            | CO: 0.35 $\mu\text{mol h}^{-1}$    | Adv. Mater. 2020, 32, 1908350.             |
| Mg-In LDH                      | 200 W Hg-Xe lamp, full arc                                         | CO: 0.4 $\mu\text{mol h}^{-1}$     | Angew. Chem. Int. Ed. 2012, 51, 8008–8011. |

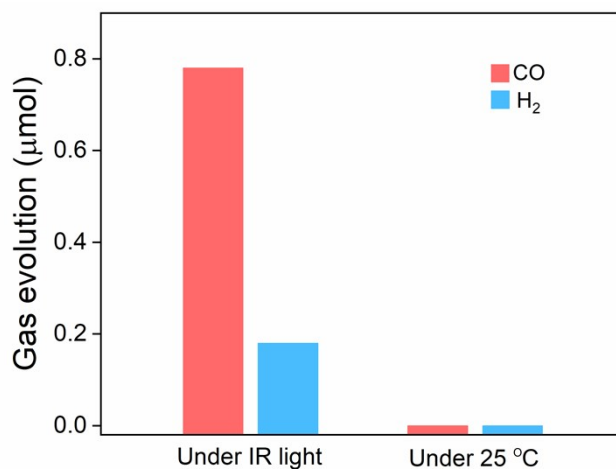

Figure S6. CO and H<sub>2</sub> evolution over B<sub>13</sub>P<sub>2</sub> under IR light and 25 °C condition without light, respectively. The reaction time is 6 hours and Co(bpy)<sub>3</sub><sup>2+</sup> is used as cocatalyst.

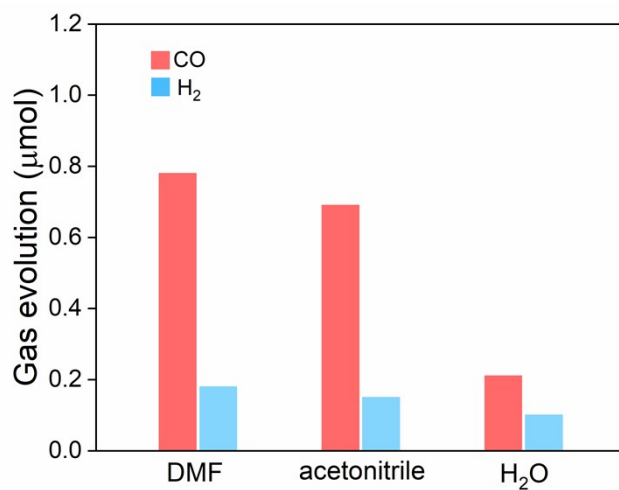

Figure S7. CO and H<sub>2</sub> evolution over B<sub>13</sub>P<sub>2</sub> under IR light in different solvent in the presence of TEOA as sacrificial agent. The reaction time is 6 hours and Co(bpy)<sub>3</sub><sup>2+</sup> is used as cocatalyst.

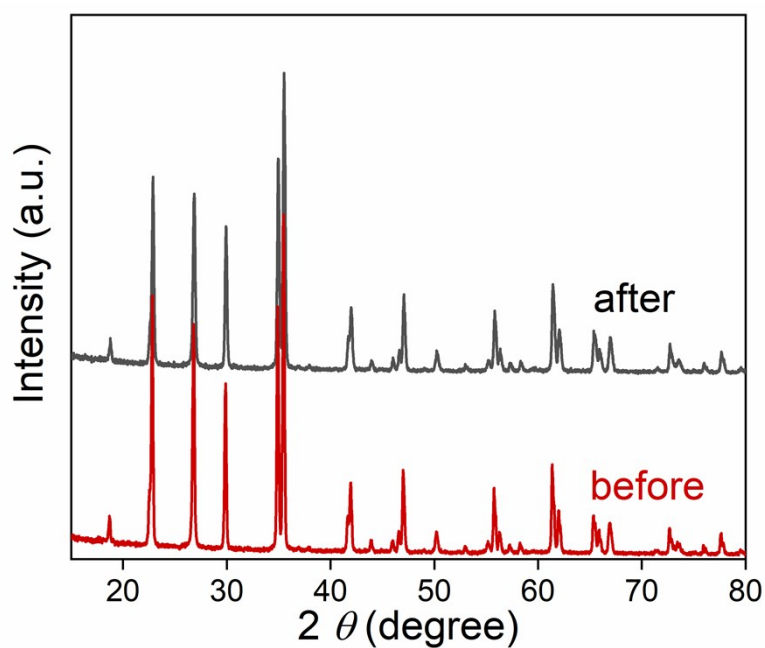

Figure S8. XRD patterns of B<sub>13</sub>P<sub>2</sub> before and after photocatalytic CO<sub>2</sub> reduction for 6 cycles.

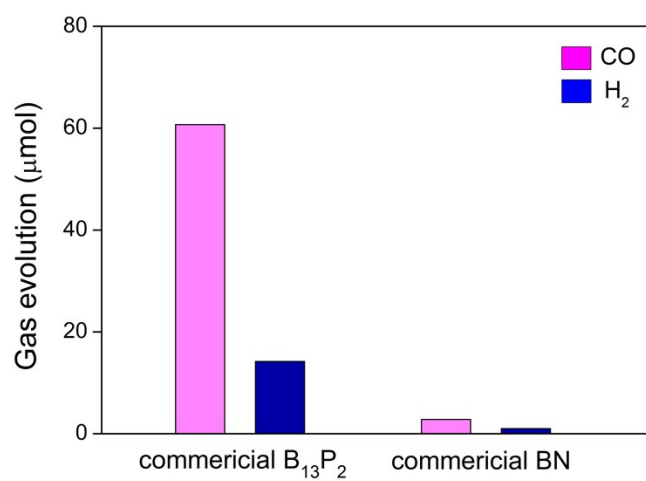

Figure S9. Photocatalytic CO<sub>2</sub> reduction performances over commercial B<sub>13</sub>P<sub>2</sub> and BN under full arc (UV+ Vis + IR) light irradiation.

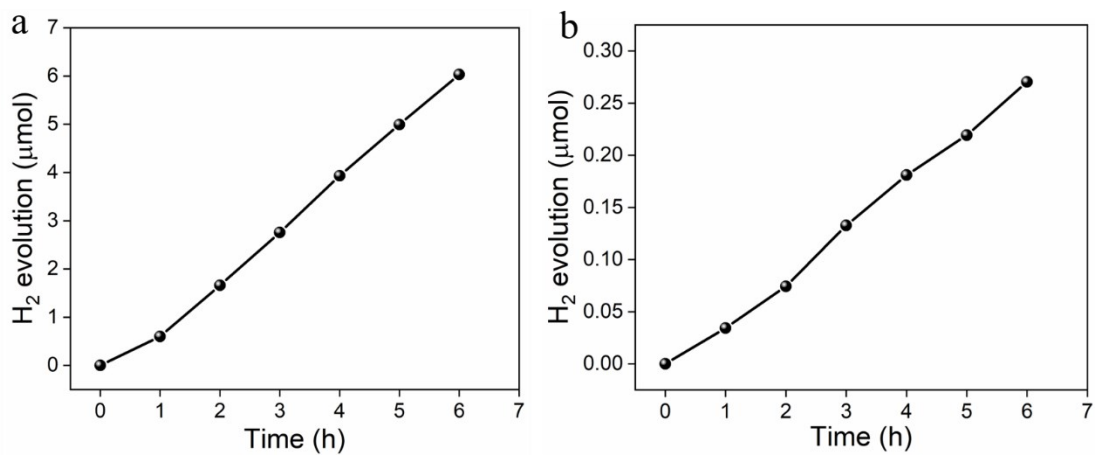

Figure S10. Photocatalytic H<sub>2</sub> evolution performances of B<sub>13</sub>P<sub>2</sub> under (a)  $\lambda > 400$  nm (Vis+ IR) light and (b) IR light.

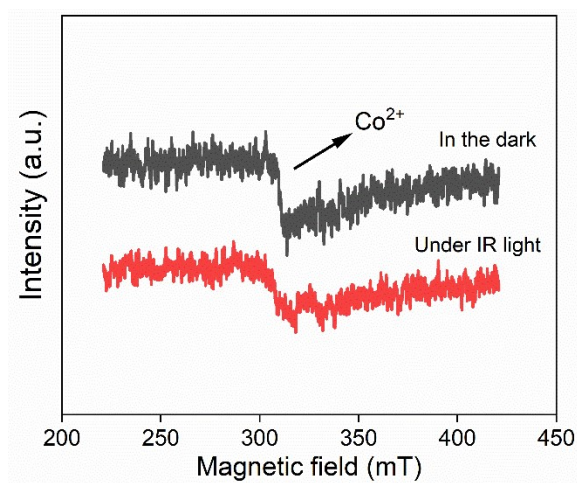

Figure S11. ESR spectra of B<sub>13</sub>P<sub>2</sub>/ Co(bpy)<sub>3</sub><sup>2+</sup> before and after IR light irradiation.

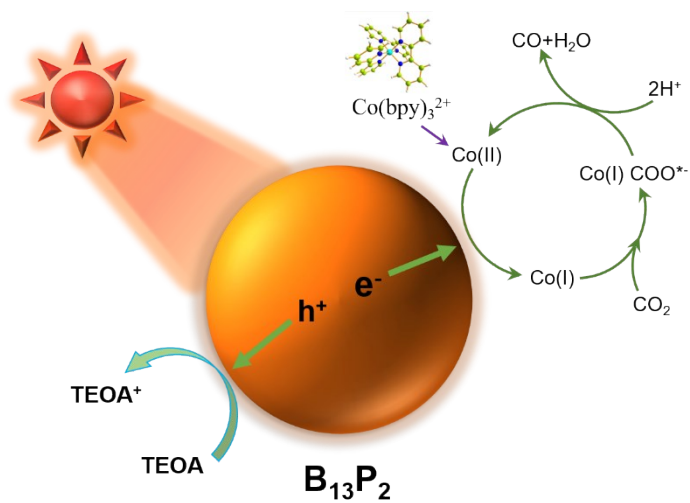

Figure S12. Proposed mechanism of  $B_{13}P_2/ Co(bpy)_3^{2+}$  for photocatalytic  $CO_2$  reduction.
